# Supplementary material for: Association of Retinopathy of Prematurity With Low Levels of Arachidonic Acid: A Secondary Analysis of a Randomized Clinical Trial
Source: PubMed Central journal article supplement (PMC5885898; doi:10.1001/jamaophthalmol.2017.6658), 2018-02-08
Supplement: jamaophthalmol-e176658-s001.pdf [file jamaophthalmol-e176658-s001.pdf]

## Supplementary Online Content

Löfqvist CA, Najm S, Hellgren G, et al. Association of retinopathy of prematurity with low levels of arachidonic acid: a secondary analysis of a randomized clinical trial. *JAMA Ophthalmol*. Published online February 8, 2018. doi:10.1001/jamaophthalmol.2017.6658

### **eTable.** FAs Included in LC-PUFA Profiles Analyzed

This supplementary material has been provided by the authors to give readers additional information about their work.

**eTable.** FAs Included in LC-PUFA Profiles Analyzed

| <b>FATTY ACIDS</b>                 |                       |
|------------------------------------|-----------------------|
| <b>Common name</b>                 | Median (Min-Max) mol% |
| <b>Saturated Fatty Acids</b>       |                       |
| 14:0 (Myristic acid)               | 0,5 (0,3-1,2)         |
| 15:0 (Pentadecylic acid)           | 0,2 (0,1-0,3)         |
| 16:0 (Palmitic acid)               | 34,5 (30,5-41,6)      |
| 17:0 (Margaric acid)               | 0,3 (0,2-0,5)         |
| 18:0 (Stearic acid)                | 13,7 (11,1-18,0)      |
| 20:0 (Arachidic acid)              | 0,6 (0,1-2,0)         |
| 22: 0 (Behenic acid)               | 0,9 (0,5-1,5)         |
| 23:0 (Tricosylic acid)             | 0,2 (0,0-4,9)         |
| 24:0 (Lignoceric acid)             | 1,0 (0,4-2,1)         |
| <b>Unsaturated Fatty Acids</b>     |                       |
| <b>ω -3</b>                        |                       |
| 18:3 ω-3 (α-Linolenic acid)        | 0,0 (0,0-3,0)         |
| 20:5 ω-3 (Eicosapentaenoic acid)   | 0,6 (0,2-1,6)         |
| 22:6 ω-3 (Docosahexaenoic acid)    | 3,4 (0,8-5,8)         |
| <b>ω -6</b>                        |                       |
| 18:2 ω-6 (Linoleic acid)           | 6,6 (3,1-12,0)        |
| 18:3 ω-6 (γ-linolenic acid)        | 0,1 (0,0-0,6)         |
| 20:2 ω-6 (Eicosadienoic acid)      | 0,6 (0,2-2,8)         |
| 20:3 ω-6 (Dihomo-γ-linolenic acid) | 2,7 (1,5-4,9)         |
| 20:4 ω-6 (Arachidonic acid)        | 15,4 (10,2-21,7)      |
| <b>ω -7</b>                        |                       |
| 16:1 ω-7 Palmitoleic acid          | 1,0 (0,3-3,0)         |
| 18:1 ω-7 (cis-Vaccenic acid)       | 3,0 (1,9-4,6)         |
| <b>ω -9</b>                        |                       |
| 18:1 ω-9 (Oleic acid)              | 11,4 (7,2-15,6)       |
| 24:1 ω-9 (Nervonic acid)           | 2,6 (1,2-4,9)         |
